# Supplementary material for: Prophylactic Cavotricuspid Isthmus Ablation in Atrial Fibrillation without Documented Typical Atrial Flutter: A Systematic Review and Meta-analysis
Source: PubMed Central journal article supplement — Arrhythm Electrophysiol Rev. 2022 Apr;11:e10. doi: 10.15420/aer.2021.37 (PMC9277616; doi:10.15420/aer.2021.37), 2022-04
Supplement: aer-11-e10-Supp.pdf [file aer-11-e10-Supp.pdf]

**Table 1: Study Characteristics**

| Study                                 | Design        | Centre        | Country     | Sample size, n | Type of atrial arrhythmia                                     | Mapping system       | AF ablation                              | Blanking period | AAD during blanking period | Follow-up period   | AADs during follow-up period | Arrhythmia detection method             |
|---------------------------------------|---------------|---------------|-------------|----------------|---------------------------------------------------------------|----------------------|------------------------------------------|-----------------|----------------------------|--------------------|------------------------------|-----------------------------------------|
| Kim et al. 2021 <sup>22</sup>         | RCT           | Multicentre   | South Korea | 366            | Paroxysmal AF                                                 | CARTO<br>EnSite NavX | PVI                                      | 3 months        | Yes                        | 3.4 years (median) | Yes/no                       | ECG<br>Holter monitor                   |
| Lee et al. 2019 <sup>23</sup>         | Retrospective | Single-centre | Taiwan      | 139            | Paroxysmal AF<br>Persistent AF<br>Long-standing persistent AF | EnSite NavX          | PVI ± linear ablation/CFAE ablation/SVCI | 3 months        | Yes                        | 21 ± 9 months      | Yes/no                       | ECG<br>Holter monitor                   |
| Mesquita et al. 2018 <sup>24</sup>    | Retrospective | Multicentre   | Portugal    | 822            | Paroxysmal AF<br>Persistent AF<br>Long-standing persistent AF | CARTO<br>EnSite NavX | PVI                                      | 3 months        | Yes                        | 24 months          | Yes/no                       | ECG<br>Holter monitor<br>Event recorder |
| Pontoppidan et al. 2009 <sup>14</sup> | RCT           | Multicentre   | Denmark     | 149            | Paroxysmal AF<br>Persistent AF                                | CARTO                | PVI ± linear ablation                    | 3 months        | Yes                        | 12 months          | Yes/no                       | ECG<br>Holter monitor                   |

*AADs = antiarrhythmic drugs; CFAE = complex fractionated atrial electrograms; PVI = pulmonary vein isolation; RCT = randomized controlled trial; SVCI = superior vena cava isolation.*

**Table 2: Patient Characteristics**

| Study                                 | Group              | Sample size | Male sex         | Age (years) | AF                  |                 |                                              | Comorbid     |                 |               |              |                 | Echocardiography |             |                         |
|---------------------------------------|--------------------|-------------|------------------|-------------|---------------------|-----------------|----------------------------------------------|--------------|-----------------|---------------|--------------|-----------------|------------------|-------------|-------------------------|
|                                       |                    |             |                  |             | AF duration, months | Paroxysmal AF   | CHA <sub>2</sub> DS <sub>2</sub> -VASc score | HF           | HT              | Stroke        | CAD          | DM              | LVEF, %          | LAD, mm     | LAVI, mL/m <sup>2</sup> |
| Kim et al. 2021 <sup>22</sup>         | PVI + CTI ablation | 183         | 122 (66.7)       | 57.3 ± 11.2 | NA                  | 122 (100.0)     | 1.3 ± 1.3                                    | 3 (1.6)      | 79 (43.2)       | 5 (2.7)       | NA           | 19 (10.4)       | 63.4 ± 6.7       | 39.4 ± 5.5  | NA                      |
|                                       | PVI                | 183         | 127 (69.4)       | 59.4 ± 10.1 | NA                  | 127 (100.0)     | 1.4 ± 1.2                                    | 4 (2.2)      | 77 (42.1)       | 9 (4.9)       | NA           | 21 (11.5)       | 63.5 ± 5.3       | 38.9 ± 5.7  | NA                      |
| Lee et al. 2019 <sup>23</sup>         | PVI + CTI ablation | 57          | 39 (68.4)        | 60.1 ± 10.0 | 29.0 ± 11.0         | 36 (63.2)       | 1.9 ± 1.4                                    | 8 (14.0)     | 37 (64.9)       | 5 (8.8)       | NA           | 9 (15.8)        | 64.9 ± 11.0      | 39.7 ± 5.1  | NA                      |
|                                       | PVI                | 82          | 45 (54.9)        | 57.8 ± 11.0 | 21.0 ± 12.0         | 77 (93.9)       | 1.6 ± 1.3                                    | 1 (1.2)      | 40 (48.8)       | 6 (7.3)       | NA           | 16 (19.5)       | 68.4 ± 9.2       | 36.0 ± 5.6  | NA                      |
| Mesquita et al. 2018 <sup>24</sup>    | PVI + CTI ablation | 411         | 289 (70.3)       | 59.0 ± 2.5  | NA                  | 259 (63.0)      | 2.0 ± 0.4                                    | NA           | 197 (47.9)      | 14 (3.4)      | 21 (5.1)     | 30 (7.3)        | NA               | NA          | 57.3 ± 3.5              |
|                                       | PVI                | 411         | 286 (69.6)       | 59.0 ± 2.4  | NA                  | 262 (63.7)      | 2.0 ± 0.4                                    | NA           | 190 (46.2)      | 24 (5.8)      | 20 (4.9)     | 35 (9.5)        | NA               | NA          | 55.3 ± 3.0              |
| Pontoppidan et al. 2009 <sup>14</sup> | PVI + CTI ablation | 73          | 54 (74.0)        | 56.0 ± 8.0  | 78.0 ± 62.6         | 38 (52.1)       | NA                                           | 16 (21.9)    | 21 (28.8)       | NA            | 3 (4.1)      | 8 (11.0)        | 60.0 ± 10.0      | 48.0 ± 7.0  | NA                      |
|                                       | PVI                | 76          | 52 (68.4)        | 56.0 ± 8.0  | 54.6 ± 48.7         | 42 (55.3)       | NA                                           | 16 (21.1)    | 35 (46.1)       | NA            | 2 (2.6)      | 9 (11.8)        | 64.0 ± 9.0       | 46.0 ± 6.0  | NA                      |
| Overall                               |                    | 1476        | 1014/1476 (68.7) | 58.5 ± 10.8 | 43.0 ± 112.3        | 963/1476 (65.2) | 1.7 ± 2.9                                    | 48/654 (7.3) | 676/1476 (45.8) | 63/1327 (4.7) | 46/971 (4.7) | 147/1476 (10.0) | 64.0 ± 20.7      | 41.3 ± 39.1 | 56.3 ± 28.7             |

*CAD = coronary artery disease; CHA<sub>2</sub>DS<sub>2</sub>-VASc = congestive heart failure, hypertension, age ≥75 years, diabetes, prior stroke or transient ischaemic attack, vascular disease, age 65–74 years, sex class; CTI = cavotricuspid isthmus; DM = diabetes; HF = heart failure; HT = hypertension; LAD = left atrial diameter; LAVI = left atrial volume index; LVEF = left ventricular ejection fraction; NA = not available; PVI = pulmonary vein isolation.*
